# Supplementary material for: Socioeconomic and demographic characterization of an endemic malaria region in Brazil by multiple correspondence analysis
Source: PubMed Central journal article supplement (PMC5625626; doi:10.1186/s12936-017-2045-z), 2017-10-02
Supplement: 12936_2017_2045_MOESM2_ESM.pdf [file 12936_2017_2045_MOESM2_ESM.pdf]

**Additional file 2 - Images of exemplification of the types of localities in the study area.**

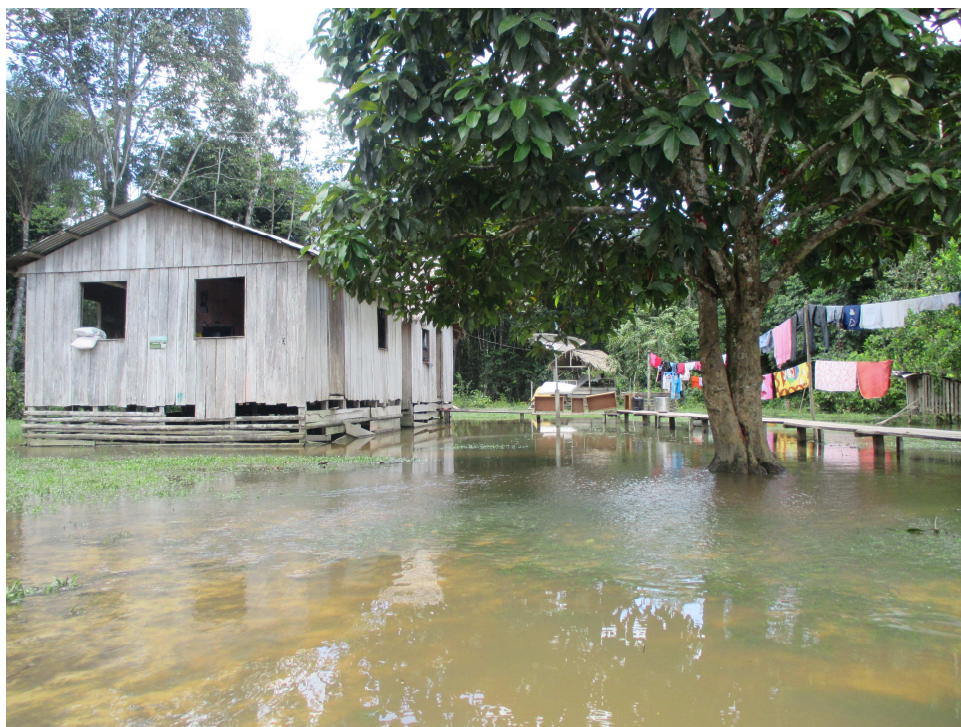

**Figure A21. A typical household for riverine population in ML.r.**

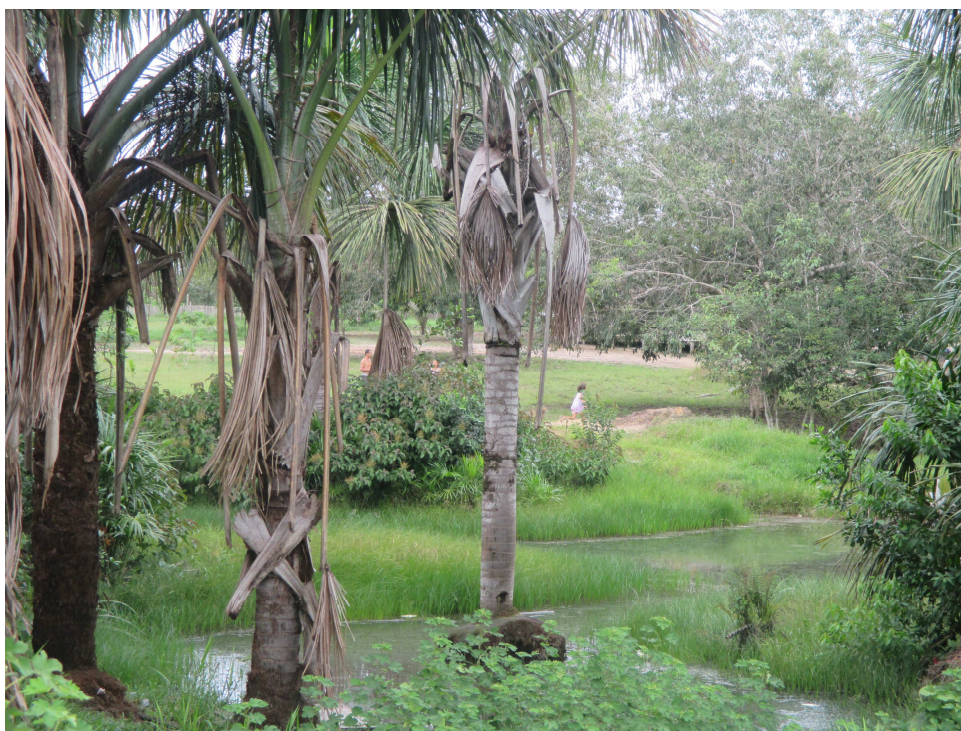

**Figure A22. A typical swamp in urban zones.**



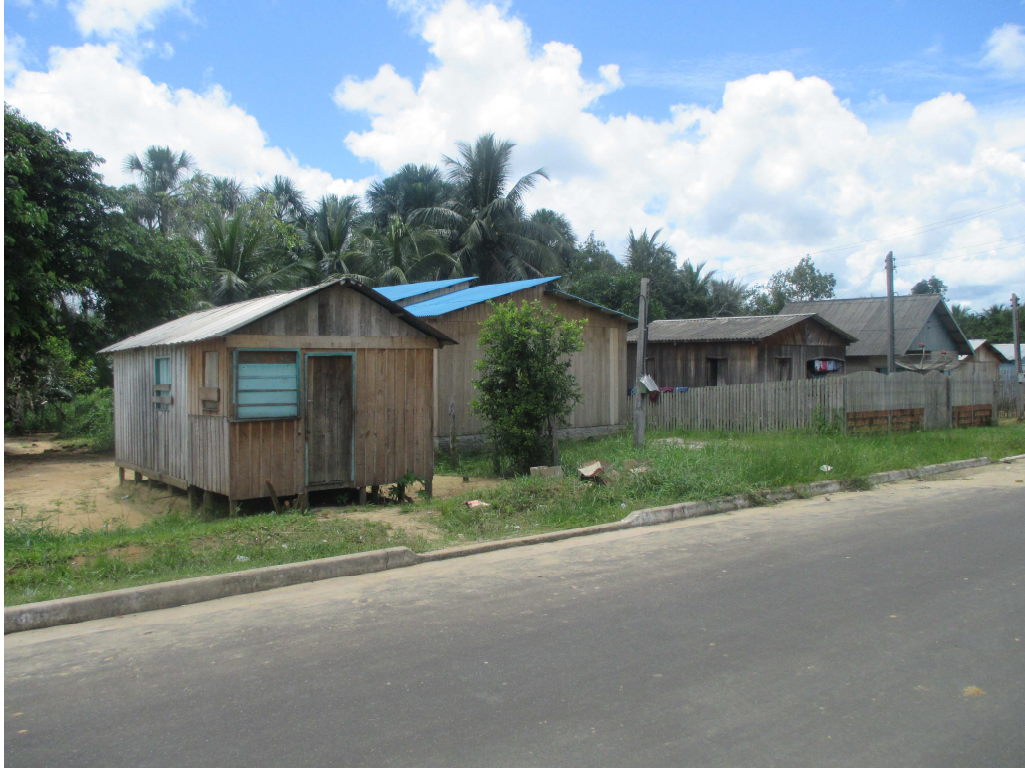

**Figure A23. Wood household in urban zones.**

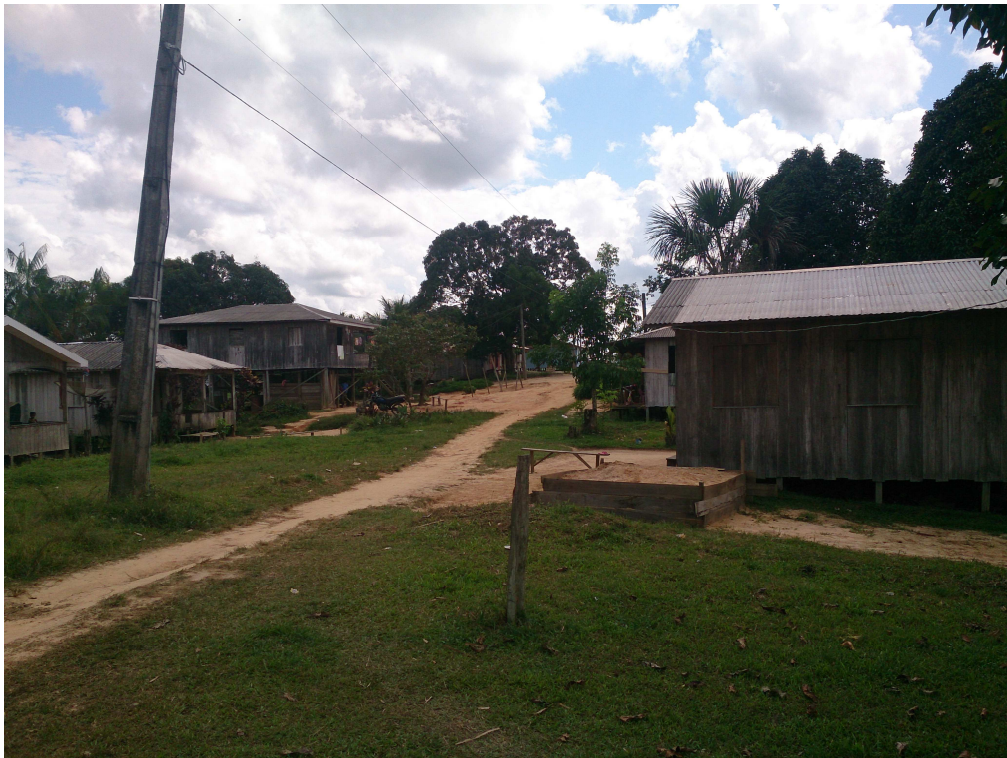

**Figure A24. Rural locality in RA.r.**

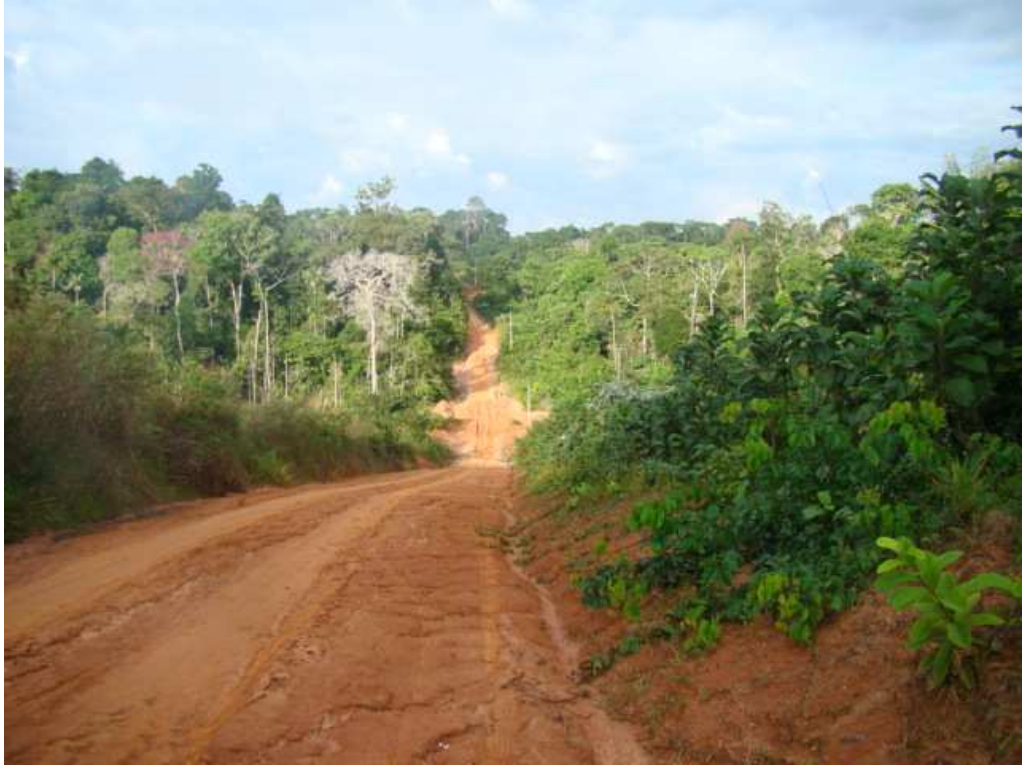

**Figure A25. *Ramais* (dirt road) in RA.r**
