# Supplementary material for: Socioeconomic and demographic characterization of an endemic malaria region in Brazil by multiple correspondence analysis
Source: PubMed Central journal article supplement (PMC5625626; doi:10.1186/s12936-017-2045-z), 2017-10-02

## Additional file 4 - Details of Mixed Logistic Regression Models analyzes

**Description:** Mixed Logistic Regression Models for the outcome "self report of malaria in the household in the last 12 months".

The table shows the goodness-of-fit of the models with no fixed effects (Null) and models with the development gradients extracted from the MCA. Dim 1 = urban-rural gradient, Dim 2 = Rural-riverine gradient, Dim 3 = housing structure gradient. Zone refers to the model with a 4-level covariate (one for each study zone).

| Model | Description        | AIC     | df |
|-------|--------------------|---------|----|
| A     | Null               | 698.423 | 2  |
| B     | Dim1 + Dim2 + Dim3 | 693.083 | 5  |
| C     | Dim1+ Dim2         | 692.368 | 4  |
| D     | Dim1               | 692.790 | 3  |
| E     | Zone               | 695.721 | 5  |

The figure below shows the marginal probability of malaria in households along the three development gradients. Each graph shows the effect of a given gradient setting the other two dimensions to 0.

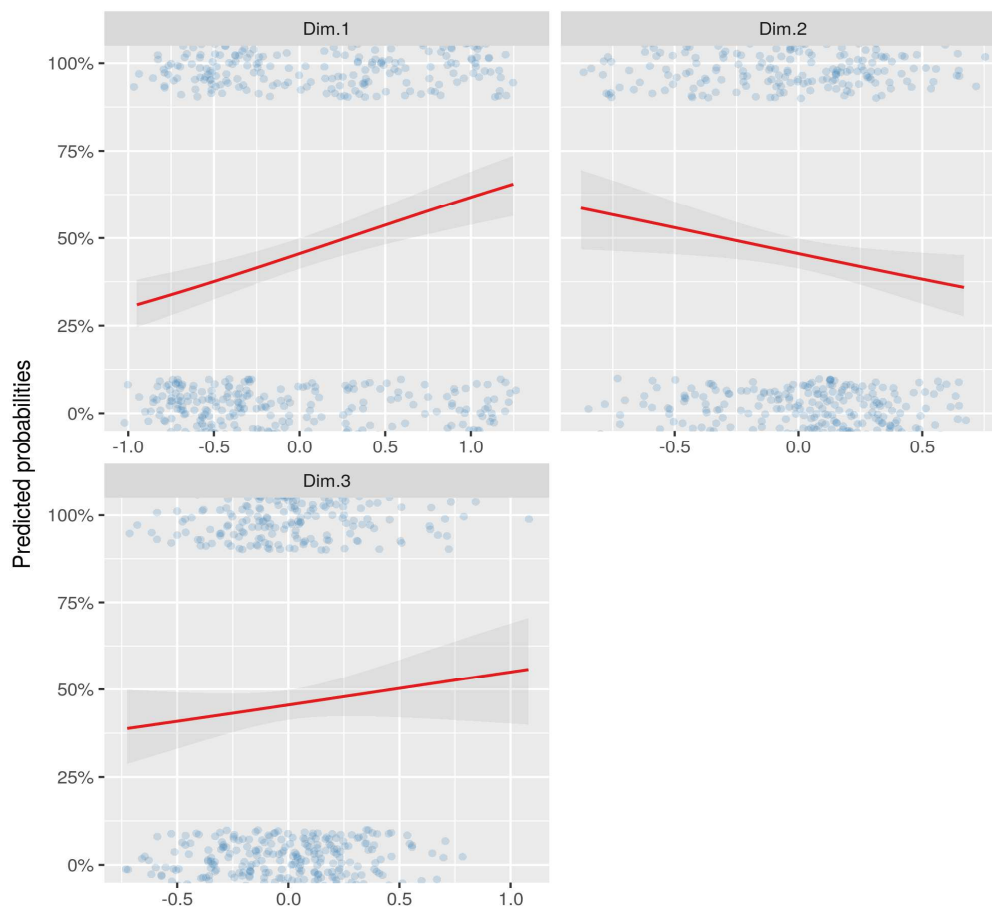

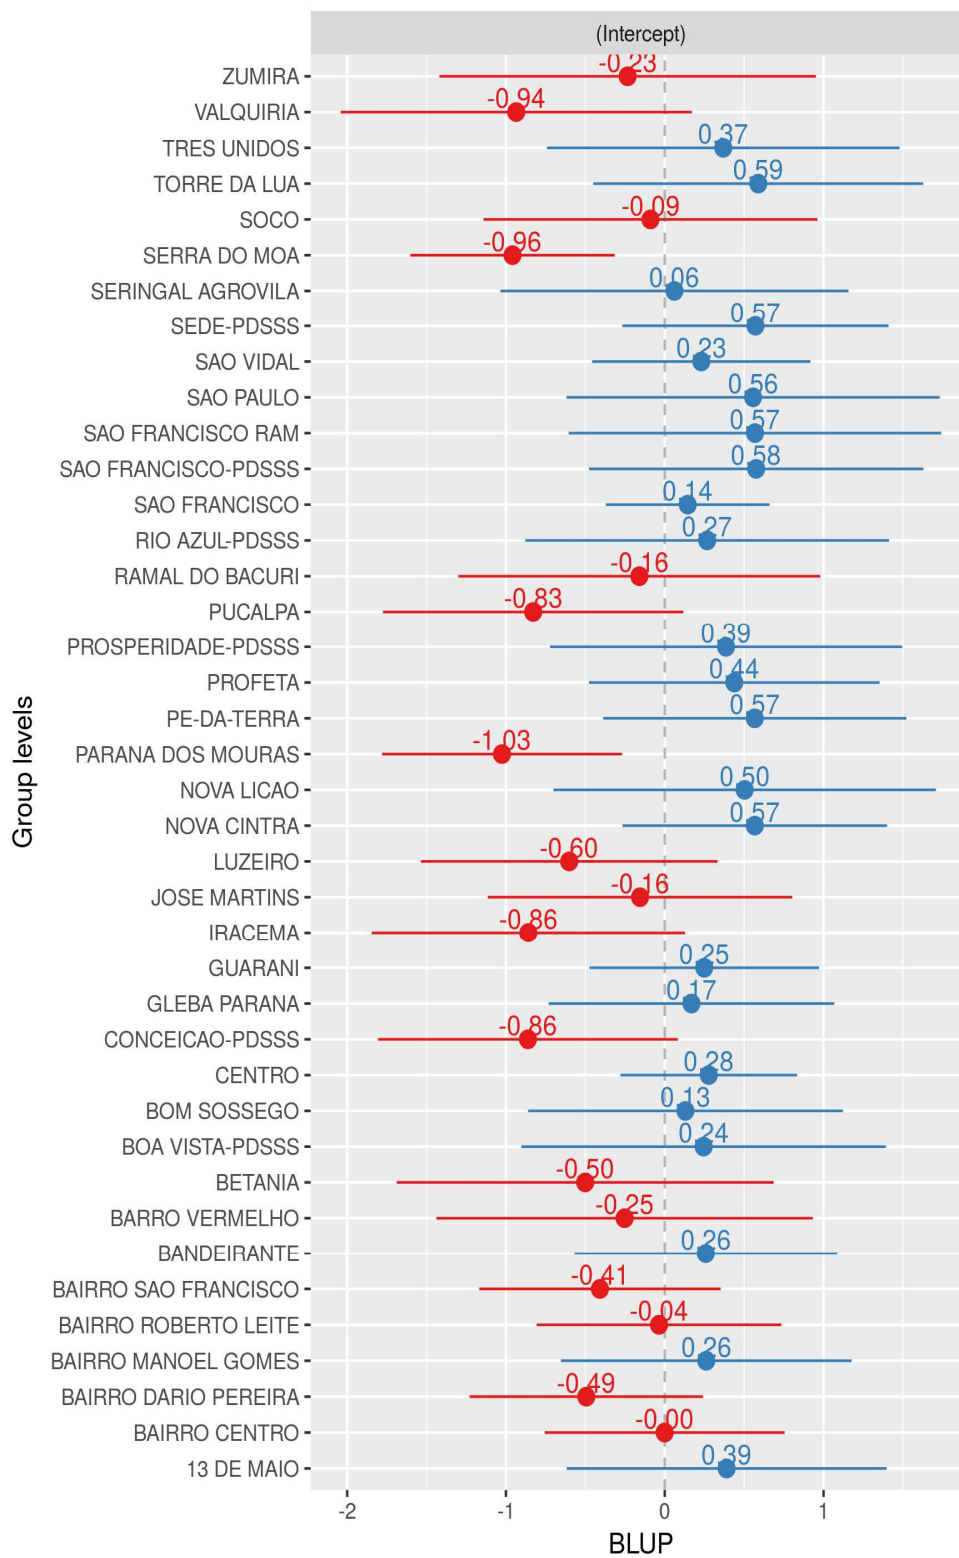

Supplement: 12936_2017_2045_MOESM4_ESM.pdf [file 12936_2017_2045_MOESM4_ESM.pdf]
