# Supplementary material for: Socioeconomic and demographic characterization of an endemic malaria region in Brazil by multiple correspondence analysis
Source: Springer Nature journal article supplement (doi:10.1186/s12936-017-2045-z), 2017-10-02
Supplement: MOESM1 [file 15099672]

### Additional file 1 - Information of the study localities.

Description: Zone (r = rural, u = urban, ML = Mâncio Lima, RA = Rodrigues Alves), name and abbreviation.

| <b>Zone</b> | <b>Localities' names</b> | <b>Abbreviation</b> |
|-------------|--------------------------|---------------------|
| ML.r        | TRÊS UNIDOS              | TRU                 |
| ML.r        | NOVA LIÇÃO               | NOL                 |
| ML.r        | BOM SOSSEGO              | BOS                 |
| ML.r        | BARRO VERMELHO           | BAV                 |
| ML.r        | RIO AZUL-PDSSS           | RIA                 |
| ML.r        | SERRA DO MOA             | SDM                 |
| ML.r        | CONCEIÇÃO-PDSSS          | CON                 |
| ML.r        | SEDE-PDSSS               | SED                 |
| ML.r        | PROSPERIDADE-PDSSS       | PROS                |
| ML.r        | ZUMIRA                   | ZUM                 |
| ML.r        | SÃO FRANCISCO-PDSSS      | SFP                 |
| ML.r        | BOA VISTA-PDSSS          | BOV                 |
| ML.r        | SOCÓ                     | SOC                 |
| ML.r        | PÉ-DA-TERRA              | PET                 |
| ML.u        | SÃO FRANCISCO            | SFO                 |
| ML.u        | BANDEIRANTE              | BAN                 |
| ML.u        | IRACEMA                  | IRA                 |
| ML.u        | CENTRO                   | CEN                 |
| ML.u        | JOSÉ MARTINS             | JOM                 |
| ML.u        | SÃO VIDAL                | SAV                 |
| ML.u        | BETÂNIA                  | BET                 |
| ML.u        | GUARANI                  | GUA                 |
| RA.u        | BAIRRO MANOEL GOMES      | BMG                 |
| RA.u        | BAIRRO CENTRO            | BAC                 |
| RA.u        | BAIRRO ROBERTO LEITE     | BRL                 |
| RA.u        | BAIRRO DARIO PEREIRA     | BDP                 |
| RA.u        | BAIRRO SÃO FRANCISCO     | BSF                 |
| RA.r        | PARANÁ DOS MOURAS        | PDM                 |
| RA.r        | PUCALPA                  | PUC                 |
| RA.r        | LUZEIRO                  | LUZ                 |
| RA.r        | VALQUÍRIA                | VAL                 |
| RA.r        | SERINGAL AGROVILA        | SEA                 |
| RA.r        | 13 DE MAIO               | 1DM                 |
| RA.r        | GLEBA PARANÁ             | GLP                 |
| RA.r        | RAMAL DO BACURI          | RDB                 |
| RA.r        | TORRE DA LUA             | TDL                 |
| RA.r        | SÃO PAULO                | SAP                 |
| RA.r        | SÃO FRANCISCO RAM        | SFR                 |
| RA.r        | NOVA CINTRA              | NOC                 |
| RA.r        | PROFETA                  | PROF                |
